# Supplementary material
Source: PubMed Central journal article supplement (PMC2843401)
Supplement: NIHMS163430-supplement-supplement.pdf [file NIHMS163430-supplement-supplement.pdf]

## SUPPLEMENTAL DOCUMENT

## bFGF and PDGF-BB for tendon repair: Controlled release and biologic activity by tendon fibroblasts in vitro

Stavros Thomopoulos, Rosalina Das, Shelly Sakiyama-Elbert, Matthew J. Silva,  
Nichole Charlton, Richard H. Gelberman

## Extracellular Matrix – Structural

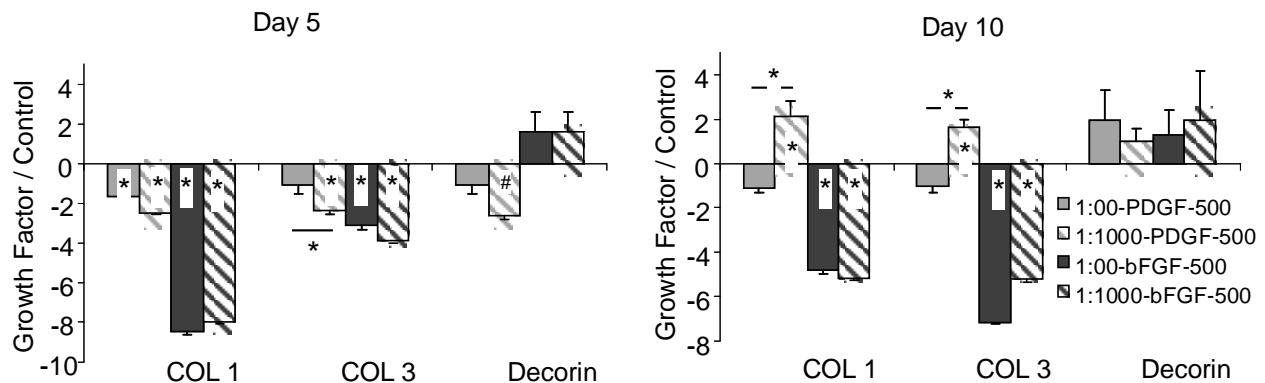

**Figure S1:** At the 1.25  $\mu\text{g}/\text{mL}$  dose, expression of lubricin and HAS2 were upregulated by bFGF (results are presented as fold changes of growth factor treated relative to control; symbols above the bars indicate comparisons between 1:1000 HBDS and no HBDS, symbols within bars indicate comparisons to control, i.e., a growth factor to control ratio of 1) (paired t-test, \*  $p < 0.05$ , trends are indicated by #  $p < 0.1$ ).

## Extracellular Matrix – Lubrication

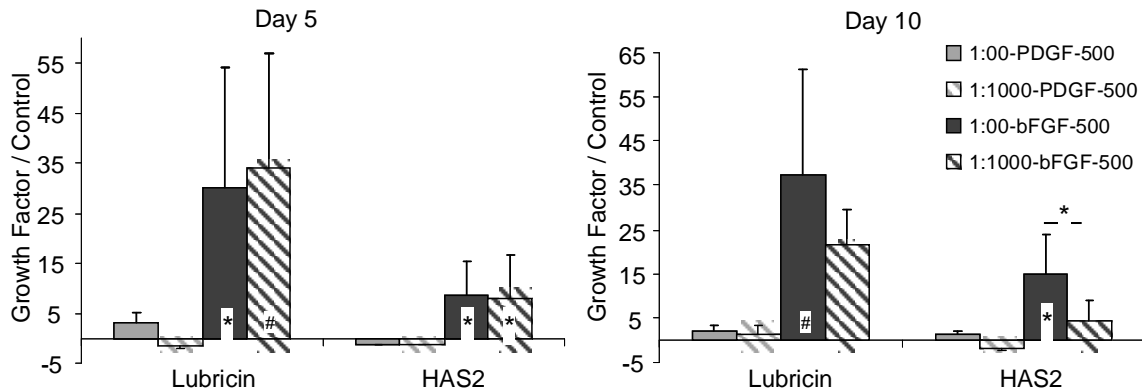

**Figure S2:** At the 1.25  $\mu\text{g}/\text{mL}$  dose, COL I and COL III were downregulated at both timepoints by bFGF. COL I and COL III were upregulated by PDGF-BB in the 1:1000 HBDS group at 10 days. Decorin expression was not significantly different in any group (results are presented as fold changes of growth factor treated relative to control; symbols above the bars indicate comparisons between 1:1000 HBDS and no HBDS, symbols within bars indicate comparisons to control, i.e., a growth factor to control ratio of 1) (paired t-test, \*  $p < 0.05$ , trends are indicated by #  $p < 0.1$ ).
